1 **Impact of visual impairment on balance and visual processing functions in students with**  
2 **special educational needs**

3 Choi KY<sup>1</sup>, Wong HY<sup>1</sup>, Cheung HN<sup>1</sup>, Tseng JK<sup>2</sup>, Chen CC<sup>2</sup>, Wu CL<sup>2</sup>, Eng H<sup>1</sup>, Woo GC<sup>1,3</sup>,  
4 Cheong AMY<sup>1,3</sup>

5 <sup>1</sup> School of Optometry, The Hong Kong Polytechnic University, Hong Kong

6 <sup>2</sup> Department of Optometry, Asia University, Taichung, Taiwan

7 <sup>3</sup> Center for Eye and Vision Research, HKSAR

8  
9 Running head:

10 Balance and visual processing in SEN students

11 Keywords:

12 Visual impairment, Low vision, Visual processing, Balance, Special educational needs

13 Correspondence's Address: Allen MY Cheong

14 School of Optometry, The Hong Kong Polytechnic University, Hung Hom, Hong Kong

15 Telephone: 852-2766-6108

16 Facsimile: 852-2764-6051

17 Electronic mail: [allen.my.cheong@polyu.edu.hk](mailto:allen.my.cheong@polyu.edu.hk)

18 Word count: 5,044

19 Number of tables: 2

20 Number of figures: 3

21

22 **Abstract**

23 Introduction

24 Vision is a critical factor for children's development. However, prevalence of visual impairment  
25 (VI) is high in students with special educational needs (SEN). Other than vision disability, this  
26 group of students is prone to having functional deficits. It is unclear whether visual problems  
27 relate to these compromised functional deficits. This study aimed to assess the impact of vision  
28 on visual processing functions and balance performance in SEN students through a community  
29 service in special schools.

30

31 Methods

32 A total of 104 (chronological age  $14.3 \pm 4.3$  years, 43 females) SEN students in Taiwan were  
33 assessed and classified as having normal vision (NV) or vision impairment (VI). Visual acuity  
34 (distance and near) and contrast sensitivity (CS) were measured as the visual outcomes. Visual  
35 processing function assessment included facial expression recognition by Heidi expression test,  
36 in terms of card matching (FEC), and examiner's facial expression matching (FEE), and visual  
37 orientation recognition (by mailbox game, VO). Dynamic balance was assessed with Timed Up  
38 and Go (TUG) test, while static standing balance was assessed using a force plate to measure the  
39 postural sway in double-legged feet-together and tandem stance with eyes open and closed  
40 conditions. Static balance was presented in terms of the change in the centre of pressure in  
41 maximal medial-lateral (ML) and antero-posterior (AP) sways, sway variability (V), and sway  
42 path length (L).

43

44 Results

45 Although visual acuity was significantly worse in VI than NV ( $p < 0.001$ ), CS was similar in the  
46 two groups ( $p = 0.08$ ). VO, FEC, and FEE also did not differ significantly between groups ( $p >$   
47  $0.05$ ). NV performed better in the TUG than VI ( $p = 0.03$ ). There was a significant interaction  
48 between eye condition and the vision group ( $p < 0.05$ ) for static balance. Pairwise comparisons  
49 showed that NV swayed significantly less in ML than VI under tandem stance-open eye  
50 condition ( $p = 0.04$ ), but significantly more in closed eye condition ( $p = 0.03$ ). Conversely, VI  
51 had less V and shorter L than NV under tandem stance-closed eye condition ( $p = 0.03$ ).

52

53 Conclusion

54 This study is the first to our knowledge to examine the effect of vision on visual processing  
55 functions and balance performance in SEN students. Vision did not appear to be the major reason  
56 for impairment in visual processing. However, vision plays an important role in maintaining  
57 dynamic and static balance in SEN students.

58

## 59 **Introduction**

60 Vision in children is crucial for their daily life, as it contributes greatly to the development of  
61 their functional abilities and essential skills needed for schooling and learning, such as reading  
62 comprehension and mathematical concepts. However, visual disabilities are common in children  
63 with special education needs (SEN).<sup>1</sup> Perinatal adversity is one of the major causes of vision  
64 loss,<sup>2,3</sup> including preterm birth, improper neonatal environment, and neurological damage, which  
65 can affect visual acuity, contrast sensitivity, and ocular alignment. The level of visual  
66 impairment has been shown to be dependent on the severity of the SEN (e.g. grading of cerebral  
67 palsy),<sup>4</sup> which was partially attributable to cerebral visual impairment.<sup>5</sup> In addition to  
68 neurological and anatomical damage, correctable refractive error was also highly prevalent in  
69 children with SEN,<sup>6,7</sup> so prescription of spectacles or other optical aids would be beneficial to  
70 improve their vision. However, recent evidence has indicated inadequate eye care service for  
71 children with SEN,<sup>8,9</sup> leading to an inappropriate educational experience due to the  
72 misunderstanding of the individual's visual status.

73 Balance function is also compromised in children with SEN, in terms of static and dynamic  
74 balance. Children with more severe cerebral palsy (higher gross motor function classification  
75 system level) recorded a greater magnitude of postural sway during a static balance measure than  
76 children with normal development,<sup>10</sup> as well as dynamic balance function measured with the  
77 Timed Up and Go (TUG) test.<sup>11</sup> Children with Down syndrome tended to spend more time to  
78 execute functional balance tasks, such as performing a standing reach<sup>12</sup> and the TUG test.<sup>13</sup> The  
79 postural control system was also found to be underdeveloped in children with autism spectrum  
80 disorder (ASD)<sup>14</sup> and deafness.<sup>15</sup> For children with other intellectual disabilities, it was  
81 controversial whether their balance function was inferior to their peers with normal

82 development.<sup>16, 17</sup> However, visual impairment was associated with reduced balance function.<sup>17,</sup>  
83 <sup>18</sup> It was also reported that postural sway for male participants with visual impairment, regardless  
84 whether their eyes were open or closed, was similar to that of sighted participants with their eyes  
85 closed.<sup>19</sup> This implied that vision had less impact on postural control despite compromised  
86 balance function in visually impaired patients. Balance function in children with disruption of  
87 binocular vision, due to strabismus or amblyopia, was significantly reduced.<sup>20</sup> However, postural  
88 control was significantly improved after corrective surgery in children with strabismus,<sup>21</sup>  
89 suggesting that there was a possibility to improve balance function by correcting vision or  
90 improved visual function. Children with visual impairment had poorer postural sway in both  
91 double-leg and single-leg standing compared with their sighted peers.<sup>22</sup> However, reduced static  
92 balance function was only found in eye-open, but not eye-closed condition. Both dynamic  
93 functional balance and coordination were also reported to be weaker in children who were  
94 visually impaired.<sup>23, 24</sup> Despite the important role of vision on balance function, no studies have  
95 considered the impact of visual impairment in children who are more prone to have  
96 compromised balance function (e.g. children with SEN).

97 Visual processing is the ability of the brain to acquire, compute, and interpret visual information.  
98 In view of the importance of vision in childhood development, thorough assessment of visual  
99 function and related visual processing functions can provide information on the limitations of the  
100 SEN children.<sup>25</sup> Visuo-spatial and visuo-perceptual impairment, in terms of facial recognition  
101 and line orientation judgement, are common in children with bilateral cerebral palsy<sup>26</sup> and  
102 ASD.<sup>27, 28</sup> Extremely pre-term birth or very low birth weight were associated with visual  
103 processing disorders and poorer academic performance in adolescents, after controlling for other  
104 perinatal risk factors.<sup>29</sup> However, based on the various capabilities of the SEN children, it has

105 been suggested that evaluation for visual processing function could be better delivered in play  
106 situations,<sup>30</sup> especially for children who functioned normally in other visual tasks, such as visual  
107 acuity.<sup>31</sup> Despite the importance of vision on learning different perceptual skills, it is unclear  
108 whether visual impairment further impairs visual processing performance in children with SEN.  
109 Previous studies have suggested poorer balance function, weaker visual processing function, and  
110 higher prevalence of vision impairment in students with SEN. However, it is unclear whether  
111 compromised vision further impairs these SEN students' balance and visual processing  
112 performance. To our knowledge, this is the first study aiming to investigate the impact of vision  
113 on visual processing function and balance performance (dynamic and static) in students attending  
114 special-care schools in Taiwan.

115

## 116 **Methods**

### 117 **Study population**

118 This study analysed cross-sectional data collected as part of a community service project to  
119 provide eye care services for students with special needs attending ten special schools in Taiwan.  
120 All tests were conducted by optometrists and trained university students. Referring to the study  
121 designed by Klavina et al.,<sup>18</sup> to detect a difference in postural balance between visually impaired  
122 and intellectually disabled students, 20 students in each group were needed to detect an effect  
123 size of 1.20 (GPower, two-tail test,  $\alpha = 0.05$ , Power = 95%). Given the wide variety of SEN  
124 students recruited, a more conservative effect size of 1.0 was adopted, with a sample size of 29 in  
125 each group. A total of 157 students agreed to participate in the study, of whom 127 had  
126 measurable visual acuity and at least one functional measurement. Students with solely visual

127 impairment, but otherwise normal development (i.e. absence of other non-visual disabilities, n =  
128 23) were excluded. The remaining 104 students (chronological age  $14.3 \pm 4.3$  years, range 4 – 19  
129 years, 43 females) were included in the analysis to assess the impact of vision on students with  
130 different disabilities, including cerebral palsy, ASD, Down syndrome, and other intellectual  
131 disabilities. Written consent and verbal assent (if feasible) were obtained from the guardians and  
132 the students, respectively. All study procedures followed the tenets of the Declaration of Helsinki  
133 and were approved by The Hong Kong Polytechnic University Human Subjects Ethics  
134 Subcommittee.

135

### 136 **Data collection**

137 Demographics and information on the disabilities were obtained by a structured questionnaire  
138 completed by either the guardians or school teachers. The questionnaire included birth history,  
139 types of disabilities, self-report vision status, and visual problems. The subtypes of SEN were  
140 classified as cerebral palsy (CP), ASD, Down syndrome (DS), isolated intellectual disability (ID),  
141 and Others which included deaf-mute, Rett syndrome, inborn errors of metabolism, etc.

142 Distance visual acuity was measured monocularly by Lea symbols at 3 m (or 1.5 m if vision was  
143 poor) using matching toys (The Good-Lite Company, USA). If the students were intellectually  
144 incapable of performing the test, tests with lower cognitive requirement were used, sequentially  
145 Cardiff acuity test at 1 m by pointing at the direction, Cardiff acuity test at 1 m by preferential  
146 looking, and Lea gratings at 57 cm by preferential looking. Habitual visual acuity of the better-  
147 seeing eye was converted into LogMAR acuity, allowing subjects to be classified into two  
148 groups: normal vision (NV,  $\text{LogMAR} < 0.50$ ) and visual impairment (VI,  $\text{LogMAR} \geq 0.50$ ).

149 Habitual visual acuity was used for grouping because the functional performances were assessed  
150 with visual correction aids. Near visual acuity was measured binocularly by LEA near vision  
151 card (The Good-Lite Company, USA). Binocular contrast sensitivity (CS) was measured using  
152 the letter version of Mars (The Mars Perceptrix Corp., US), or Lea low-contrast symbols flip-  
153 chart test / Hiding Heidi test (The Good-Lite Company, USA) at 40 cm if students were  
154 intellectually incapable, then LogCS was recorded. External and internal ocular health was  
155 assessed using slit lamp biomicroscopy and direct ophthalmoscope (or binocular indirect  
156 ophthalmoscope with pupil dilation upon parent's consent), respectively.

157 Visual processing function was evaluated by two paediatric tests (The Good-Lite Company,  
158 USA). Visual orientation recognition was measured using the Lea mailbox game, in which the  
159 students were asked to drop a card through a slit opening in different orientations, and the  
160 average time for five trials was recorded (VO). Facial expression recognition was measured  
161 using the Heidi expression test. The test was divided into two parts: (1) expression recognition  
162 with the Heidi cards matching (FEC): students were given a set of expression cards, then they  
163 were asked to match the card with that the examiner displayed, (2) expression recognition with  
164 the examiner's facial expression (FEE): students were given a set of expression cards, then they  
165 were asked to match the facial expression that the examiner expressed on his/her face. Both parts  
166 were timed, and the average time needed for the five trials was recorded.

167 Dynamic balance function was measured by the Timed Up and Go (TUG) test.<sup>32</sup> The students  
168 were asked to rise from a chair, walk three meters on a straight line, turn around, return to the  
169 chair, and sit down. The chair height depended on the height of the students using the common  
170 chairs provided by the schools, as the chronological age of the sample covered a wide range. The  
171 test was repeated three times, with the time needed for each trial being averaged and recorded.



172 Static balance function, in terms of postural sway, was measured using a force plate (BP400600,  
173 AMTI, US) with double-leg feet-together standing and tandem stance. Double-legged feet-  
174 together standing was chosen to mimic the natural standing position in daily life, while tandem  
175 stance condition was chosen over one-leg standing to mimic the postural stability during adverse  
176 conditions because of the limited capability of the SEN students in the current study. Postural  
177 sway was measured at each condition while standing steadily for 20 s under each of the four  
178 conditions: (1) feet together + eyes open (FO); (2) tandem stance + eyes open (TO); (3) feet  
179 together + eyes closed (FC), and (4) tandem stance + eye closed (TC). Students were asked to  
180 fixate at a distant target at 3 m under eye open condition (Figure 1). The force plate measured the  
181 subjects' position at the centre of pressure (COP), at which several variables were generated and  
182 included in the analysis: maximum medial-lateral and antero-posterior sway (ML and AP – i.e.  
183 maximal amplitude of COP in the ML and AP dimensions), sway variability (V – i.e. variability  
184 of COP around its mean value computed by the root mean square of the COP displacement in  
185 ML and AP), and sway path length (L – i.e. total distance of COP travelled).

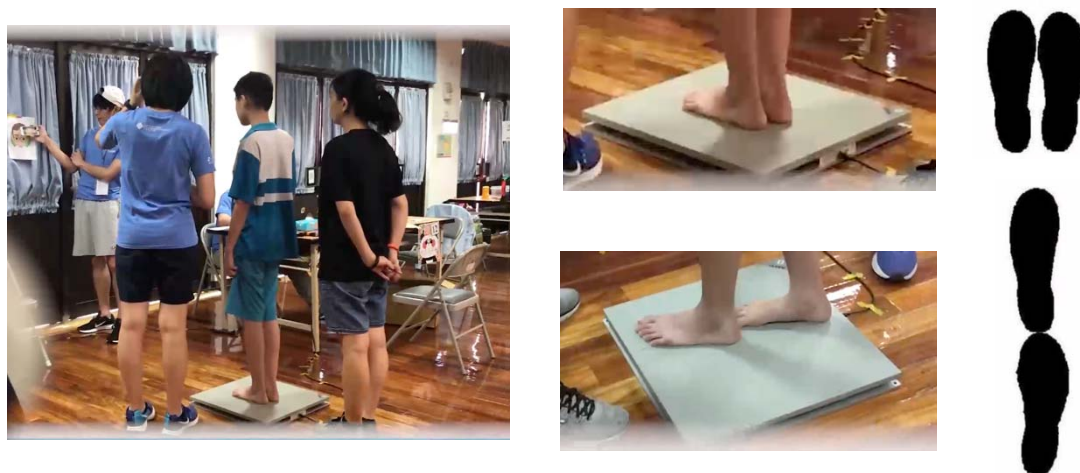

186

187 Figure 1. Measurement of postural sway while standing on a force platform for different  
188 conditions. Students were asked to fixate at a distant target at 3 m under open eye condition (left  
189 panel). Upper condition of the right panel was double-leg standing with feet together, while the  
190 lower condition was tandem stance.

191

## 192 **Statistical analysis**

193 As the distribution of some of the outcome variables was significantly different from normal,  
194 non-parametric tests were used in the analysis. Chi-square ( $\chi^2$ ) test was used to evaluate the  
195 distribution of visual impairment among the subtypes of SEN. Kruskal-Wallis test and Mann-  
196 Whitney U test were used to compare visual functions, visual processing functions, and dynamic  
197 balance function between the two vision groups. Comparison among the subtypes of SEN is  
198 included in Supplementary Table 1. For static balance, the results were transformed to achieve  
199 normality using percentile ranking followed by inverse-normal transformation into normally  
200 distributed Z-scores.<sup>33</sup> Two-way repeated measures ANOVA was used to analyse the main  
201 effects and the interaction effect between the grouping (NV and VI), eye conditions, and feet  
202 conditions on the static balance. Greenhouse-Geisser test was used whenever sphericity could  
203 not be assumed, and Bonferroni adjustment was used in the post-hoc comparisons. Inability to

204 perform the test was regarded as missing data, which was treated with pairwise deletion. Static  
205 balance was not compared among subtypes of SEN because of the limited number of students  
206 who successfully completed different conditions in each group. Significance level was set as  $p <$   
207 0.05. All statistical procedures were performed using SPSS v22 (IBM Inc, US).

208

## 209 **Results**

210 Of the 104 students, 62 (59.6%) were classified as having visual impairment (VI, i.e. visual  
211 acuity of the better eye was  $\geq 0.50$  LogMAR), in which the major causes of the reduced vision  
212 were optic nerve related (18.8%, including optic atrophy, optic nerve hypoplasia, and glaucoma),  
213 retinal impairment (17.6%, including retinopathy of prematurity, retinal dystrophy, and macular  
214 anomalies), uncorrected/under-corrected refractive error (14.1%), ocular media opacity (12.9%),  
215 and oculomotor anomaly (11.8%). However, a large proportion of VI (24.8%) was probably not  
216 due to ocular problems, but other neurological causes (e.g. cerebral visual impairment, which  
217 refers to the vision loss caused by retro-geniculate damage in the absence of ocular  
218 abnormalities). Only 23 (22.1%) of the 104 students had optical correction (11 NV, 12 VI)  
219 before participating in this study. After subjective refraction or retinoscopy, 32 students (30.8%,  
220 12 NV and 20 VI) were found to have uncorrected (24) / under-corrected (8) refractive errors and  
221 benefited from prescription of updated optical aids to improve their vision thereafter, with a  
222 mean improvement of visual acuity of LogMAR  $0.33 \pm 0.17$ . Twelve out of 20 VI students, who  
223 were prescribed with an updated optical aid, had best-corrected visual acuity better than  
224 LogMAR 0.50, reducing the prevalence of VI by 11.5%. Notably, among the 62 VI students,  
225 only 25 guardians/ teachers (40.3%) reported that they were aware of visual problems in their

226 children/ students in the questionnaire, revealing an insufficient awareness of visual problems  
227 encountered in the SEN population. Given the different capabilities of the students, it was  
228 expected that some students could not complete all the tasks. The distribution of missing data in  
229 visual processing and balance functions were independent of the grouping ( $p > 0.05$ ), indicating  
230 a similar capability in two groups. The demographics, visual functions, visual processing  
231 functions, and balance performances in terms of vision groups are listed in Table 1, whereas  
232 those in terms of the subtypes of SEN are listed in Supplementary Table 1.

233 In terms of vision, the chronological age distribution was similar in NV and VI groups ( $p = 0.44$ )  
234 and the LogCS did not differ significantly between two groups (Mann-Whitney  $U = 886.00$ ,  $p =$   
235  $0.08$ ). Chronological age was not significantly associated with performance in visual processing  
236 functions (Spearman's test,  $p > 0.05$ ). VI and NV groups also had similar performances for the  
237 visual processing functions, in terms of VO, FEC, and FEE ( $p > 0.05$ ). With respect to dynamic  
238 balance, NV students performed significantly better than VI students (Mann-Whitney  $U =$   
239  $1040.00$ ,  $p = 0.03$ ) by a median difference of 3.61 s to complete the TUG task.

240

241

242 Table 1. Comparison of demographic, visual and functional performance between vision groups  
 243 [median (IQR) or percentage]

|                                                                                                                                                   | Normal vision<br>(NV, n = 42) | Visual<br>impairment<br>(VI, n = 62) | p-value           |
|---------------------------------------------------------------------------------------------------------------------------------------------------|-------------------------------|--------------------------------------|-------------------|
| <b>Demographic:</b>                                                                                                                               |                               |                                      |                   |
| Chronological age (in years)                                                                                                                      | 16.0 (5.3)                    | 15.0 (5.0)                           | 0.32              |
| Sex                                                                                                                                               |                               |                                      | 0.88              |
| Female                                                                                                                                            | 17 (40.5%)                    | 26 (41.9%)                           |                   |
| Gestation age                                                                                                                                     |                               |                                      | 0.78              |
| Full-term ( $\geq 37$ weeks)                                                                                                                      | 28 (66.7%)                    | 42 (67.7%)                           |                   |
| Pre-term ( $< 37$ weeks)                                                                                                                          | 6 (14.3%)                     | 11 (17.8%)                           |                   |
| Unknown                                                                                                                                           | 8 (19.0%)                     | 9 (14.5%)                            |                   |
| Self-reported visual disabilities                                                                                                                 | 6 (14.3%)                     | 25 (40.3%)                           | <b>&lt; 0.01</b>  |
| <b>Vision measures:</b>                                                                                                                           |                               |                                      |                   |
| Distance acuity of the better eye (LogMAR)                                                                                                        | 0.30 (0.26)                   | 0.87 (0.55)                          | <b>&lt; 0.001</b> |
| Near acuity (LogMAR)                                                                                                                              | 0.21 (0.35)                   | 0.65 (0.89)                          | <b>&lt; 0.001</b> |
| Contrast sensitivity (LogCS)                                                                                                                      | 1.64 (0.30)                   | 1.60 (0.86)                          | 0.08              |
| <b>Functional measures:</b>                                                                                                                       |                               |                                      |                   |
| Visual orientation (VO) – time (s)                                                                                                                | 1.68 (1.37)                   | 1.78 (1.42)                          | 0.71              |
| Facial expression (Cards, FEC) – time (s)                                                                                                         | 11.00 (13.25)                 | 15.34 (19.90)                        | 0.14              |
| Facial expression (Examiner, FEE) – time (s)                                                                                                      | 15.00 (25.33)                 | 18.00 (36.30)                        | 0.52              |
| Time-up-go (TUG) – time (s)                                                                                                                       | 10.60 (4.52)                  | 13.61 (9.05)                         | <b>0.03</b>       |
| <b>Static balance (medial-lateral sway, ML) (cm)†</b>                                                                                             |                               |                                      |                   |
| (i) Feet-together with eyes open (FO)                                                                                                             | 1.62 (0.93)                   | 1.87 (1.05)                          |                   |
| (ii) Tandem stance with eyes open (TO)                                                                                                            | 1.92 (0.68)                   | 2.45 (0.91)                          |                   |
| (iii) Feet-together with eyes closed (FC)                                                                                                         | 1.47 (1.23)                   | 1.81 (1.50)                          |                   |
| (iv) Tandem stance with eye closed (TC)                                                                                                           | 2.69 (0.97)                   | 2.23 (1.39)                          |                   |
| † Only 20 (47.6%) and 32 (51.6%) students from the NV and VI groups, respectively, could complete the different conditions in the static balance. |                               |                                      |                   |

244

245 The results for different balance variables among vision groups are shown in Figure 2. In general,  
246 SEN students' static balance function varied substantially when measured in different conditions.  
247 Results from the two-way repeated measures ANOVA showed that the within-subject main  
248 effects for eye condition (i.e. eye open vs. eye closed) and feet condition (i.e. feet together vs.  
249 tandem stance) were insignificant ( $F_{1,50} < 1.15$ , all  $p > 0.05$ ) in all the outcomes, as was between-  
250 subject effect for vision group (i.e. NV vs. VI) ( $F_{1,50} < 0.92$ , all  $p > 0.05$ ). However, the  
251 interaction between the eye condition and vision group was significant in V ( $F_{1,50} = 4.24$ ,  $p =$   
252  $0.05$ ) and L ( $F_{1,50} = 4.66$ ,  $p = 0.04$ ), revealing that the absence of visual input (i.e. eye closed  
253 condition) had stronger impact on balance function in students with NV than those with VI.  
254 Further interaction among all three factors (eye condition, feet condition, and vision group) was  
255 significant in the ML ( $F_{1,50} = 7.44$ ,  $p = 0.01$ ), but not in other outcomes ( $p > 0.05$ ). Detailed  
256 statistical results are listed in Table 2.

257 In post-hoc pairwise comparisons, NV students swayed significantly less in ML than VI students  
258 under TO condition ( $p = 0.04$ ), but ML sway became significantly greater under closed eye  
259 condition ( $p = 0.02$ ). Similar findings were observed for V and L with NV students having  
260 significantly less sway under closed eye than open eye condition ( $p = 0.03$ ). In contrast, VI  
261 students swayed significantly more than NV students in V and L under eye closed and tandem  
262 stance condition ( $p = 0.03$ ). The findings demonstrated that when visual input was provided (i.e.  
263 open eye condition), students with normal vision had better static balance performance. However,  
264 when visual input was deprived (i.e. closed eye condition), students with vision impairment  
265 swayed significantly less.

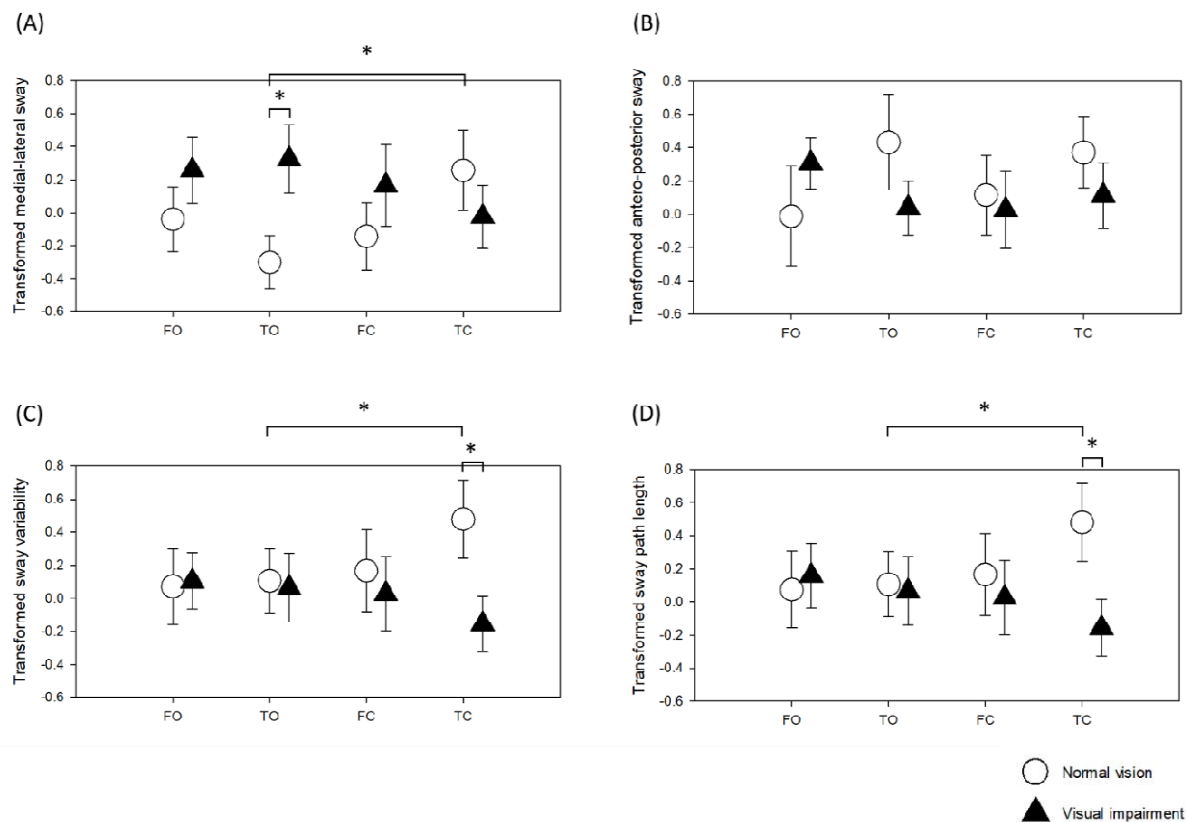

266

267 Figure 2. Static balance sway parameters in different eye and feet conditions of normal (NV) and  
268 vision impairment (VI) groups. (A) Medial-lateral sway (ML); (B) Antero-posterior sway (AP);  
269 Sway variability (V); (D) Sway path length (L). FO: Feet together standing with eyes open;  
270 TO: Tandem stance with eyes open; FC: Feet together standing with eyes closed; TC: Tandem  
271 stance with eye closed. The graph is plotted with transformed data. The error bars represent the  
272 standard error of the mean.

273

274 Table 2. Results of two-way mixed repeated measures ANOVA for static balance measures.

|                           | F <sub>1,50</sub>               | p-value      |                    | F <sub>1,50</sub>                 | p-value      |
|---------------------------|---------------------------------|--------------|--------------------|-----------------------------------|--------------|
|                           | <u>Medial-lateral sway (ML)</u> |              |                    | <u>Antero-posterior sway (AP)</u> |              |
| Group                     | 0.92                            | 0.34         | Group              | 0.18                              | 0.67         |
| Eye condition             | < 0.001                         | > 0.99       | Eye condition      | 0.08                              | 0.77         |
| Feet condition            | 0.001                           | 0.97         | Feet condition     | 1.15                              | 0.29         |
| Eye * Group               | 2.92                            | 0.09         | Eye * Group        | 0.34                              | 0.57         |
| Feet * Group              | 0.33                            | 0.57         | Feet * Group       | 3.37                              | 0.07         |
| <b>Eye * Feet * Group</b> | <b>7.44**</b>                   | <b>0.01</b>  | Eye * Feet * Group | 1.85                              | 0.18         |
|                           | <u>Sway variability (V)</u>     |              |                    | <u>Sway path length (L)</u>       |              |
| Group                     | 0.61                            | 0.44         | Group              | 0.50                              | 0.48         |
| Eye condition             | 0.21                            | 0.65         | Eye condition      | 0.09                              | 0.77         |
| Feet condition            | 0.06                            | 0.81         | Feet condition     | 0.02                              | 0.89         |
| <b>Eye * Group</b>        | <b>4.24</b>                     | <b>0.05*</b> | <b>Eye * Group</b> | <b>4.66</b>                       | <b>0.04*</b> |
| Feet * Group              | 1.25                            | 0.27         | Feet * Group       | 1.46                              | 0.23         |
| Eye * Feet * Group        | 2.22                            | 0.14         | Eye * Feet * Group | 2.14                              | 0.15         |

275 \* indicates  $p < 0.05$ , \*\* indicates  $p < 0.01$

276

277 Given the wide spectrum of disabilities in SEN students among different subtypes of SEN,  
 278 further analyses were conducted. Chronological age differed significantly among the various  
 279 subtypes of SEN ( $H = 16.21$ ,  $p < 0.01$ ). Students with SEN categorised as “Others” were  
 280 significantly younger than those with DS ( $p = 0.02$ ) and ID ( $p = 0.04$ ), respectively by a median  
 281 of 5.5 and 5.0 years. The habitual visual acuity and contrast sensitivity were similar among the  
 282 subtypes of SEN ( $p > 0.05$ ), but near visual acuity was better in Others ( $p < 0.01$ ). However,  
 283 students with different subtypes of SEN had significantly different performances in all visual  
 284 processing function tests. For VO ( $H = 10.04$ ,  $p = 0.04$ ), students with Others performed  
 285 significantly faster than those with ID ( $p = 0.03$ ). These students also performed significantly



286 faster than those with ID ( $p = 0.01$ ), ASD ( $p = 0.01$ ), and CP ( $p = 0.001$ ) for FEC ( $H = 19.17$ ,  $p =$   
287  $0.001$ ), and faster than those with ID ( $p = 0.01$ ) and CP ( $p = 0.001$ ) for FEE ( $H = 19.27$ ,  $p =$   
288  $0.001$ ). Dynamic balance function also differed significantly among subtypes of SEN ( $H = 17.67$ ,  
289  $p = 0.001$ ). Students with Others completed the TUG test faster than those with CP, DS, and ID  
290 (all  $p \leq 0.01$ ). Static balance function was not compared between SEN subtypes because of the  
291 limited number of students in each group. For example, only 2 of 13 ASD students could  
292 complete the static balance measurement due to difficulties in understanding or following the  
293 instructions.

294

## 295 **Discussion**

296 This study is the first to our knowledge to examine the effect of vision on two essential daily  
297 tasks – visual processing and balance functions in children with SEN attending special education  
298 schools. In line with previous findings, prevalence of reduced visual acuity was high in this study.  
299 Our findings showed that VI (under current definition of  $\text{LogMAR} \geq 0.5$ ) group did not perform  
300 significantly worse in functional tests, such as orientation recognition and facial recognition –  
301 two important visual processing tasks, which could be due to the relatively low visual demand of  
302 the two functional tests. In contrast, vision was significantly associated with the balance function,  
303 both dynamic and static. SEN students with visual impairment had poorer performance in the  
304 TUG test and sway parameters under open eye condition. However, when the visual input was  
305 deprived (i.e. eye closed condition), students with normal vision performed significantly worse  
306 than those with visual impairment.

307 Previous studies have reported an increased risk, as high as 75%, of visual impairment in  
308 disabled children,<sup>34</sup> whereas the current study found 59.6% of students attending the special  
309 schools had reduced vision, although this figure did not include those SEN students with solely  
310 visual impairment (n = 23). In the US, cerebral visual impairment was the leading cause of visual  
311 impairment and blindness in children<sup>35, 36</sup> and constituted 19% of the visually challenged  
312 children. Our study, echoes the previous studies in finding that the causes of reduced vision for  
313 24.8% of the SEN students were likely to be neurological, while the remainder were due to  
314 different types of ocular anomalies (e.g. optic atrophy, glaucoma). Although the types of  
315 disabilities were self-reported by guardians or teachers rather than full medical records (because  
316 of compliance with patients' privacy),<sup>37</sup> it was speculated that cerebral visual impairment was  
317 likely to be the major cause of vision loss in students attending the special schools.

318 Under the definition of  $\text{LogMAR} \geq 0.5$ , VI did not appear to be a major obstacle for visual  
319 processing functions in the current study, which could be due to the inability of students to  
320 complete the required tasks and were excluded from the analysis (VO: n = 8; FEC: n = 24; FEE:  
321 n = 36). As in a previous study, visuo-spatial and visuo-perceptual abilities were found to be  
322 impaired in 90% and 60% of subjects with cerebral palsy, respectively,<sup>26</sup> in terms of orientation  
323 judgement and facial recognition, which was independent of their visual acuity. Facial details  
324 processing deficits are also common in ASD,<sup>27, 28</sup> even if these individuals have normal vision,  
325 leading to problems such as unsustainable eye contact and switching focus for social function.  
326 Inhibition of visual input caused by visual impairment might have limited impact on such social  
327 information. In addition, both sizes of the cards in the Lea mailbox game and Heidi expression  
328 test were large (10.2 x 10.2 cm), requiring low visual demand to complete the tasks. In the  
329 current study, VO, FEC, and FEE were similar in both NV and VI students. Similarly,

330 chronological age did not show a significant association with the performance in visual  
331 processing functions (Spearman's test,  $p > 0.05$ , Figure 3). In line with previous studies, our  
332 results indicated that non-visual disabilities, e.g. intellectual disability, might account for the  
333 impaired visual processing functions rather than vision itself. To facilitate the learning of the  
334 SEN students with VI, training tools of sufficient size should be employed to accommodate their  
335 visual needs, as our results indicate VI students had similar visual processing functions. Further  
336 studies on functional assessments, such as joint attention and imitation, are warranted. In  
337 addition, the current study focused on orientation judgement and facial expression recognition.  
338 However, other types of visual processing functions, e.g. visual discrimination, visual memory,  
339 spatial relations, visual-motor, and visual-auditory integration, are also critical for development  
340 in SEN students. Further exploration on the relationship between subtypes of SEN, visual  
341 functions, optical corrections, and visual processing functions would facilitate the design of  
342 training/learning modules and benefit the development of the SEN students.

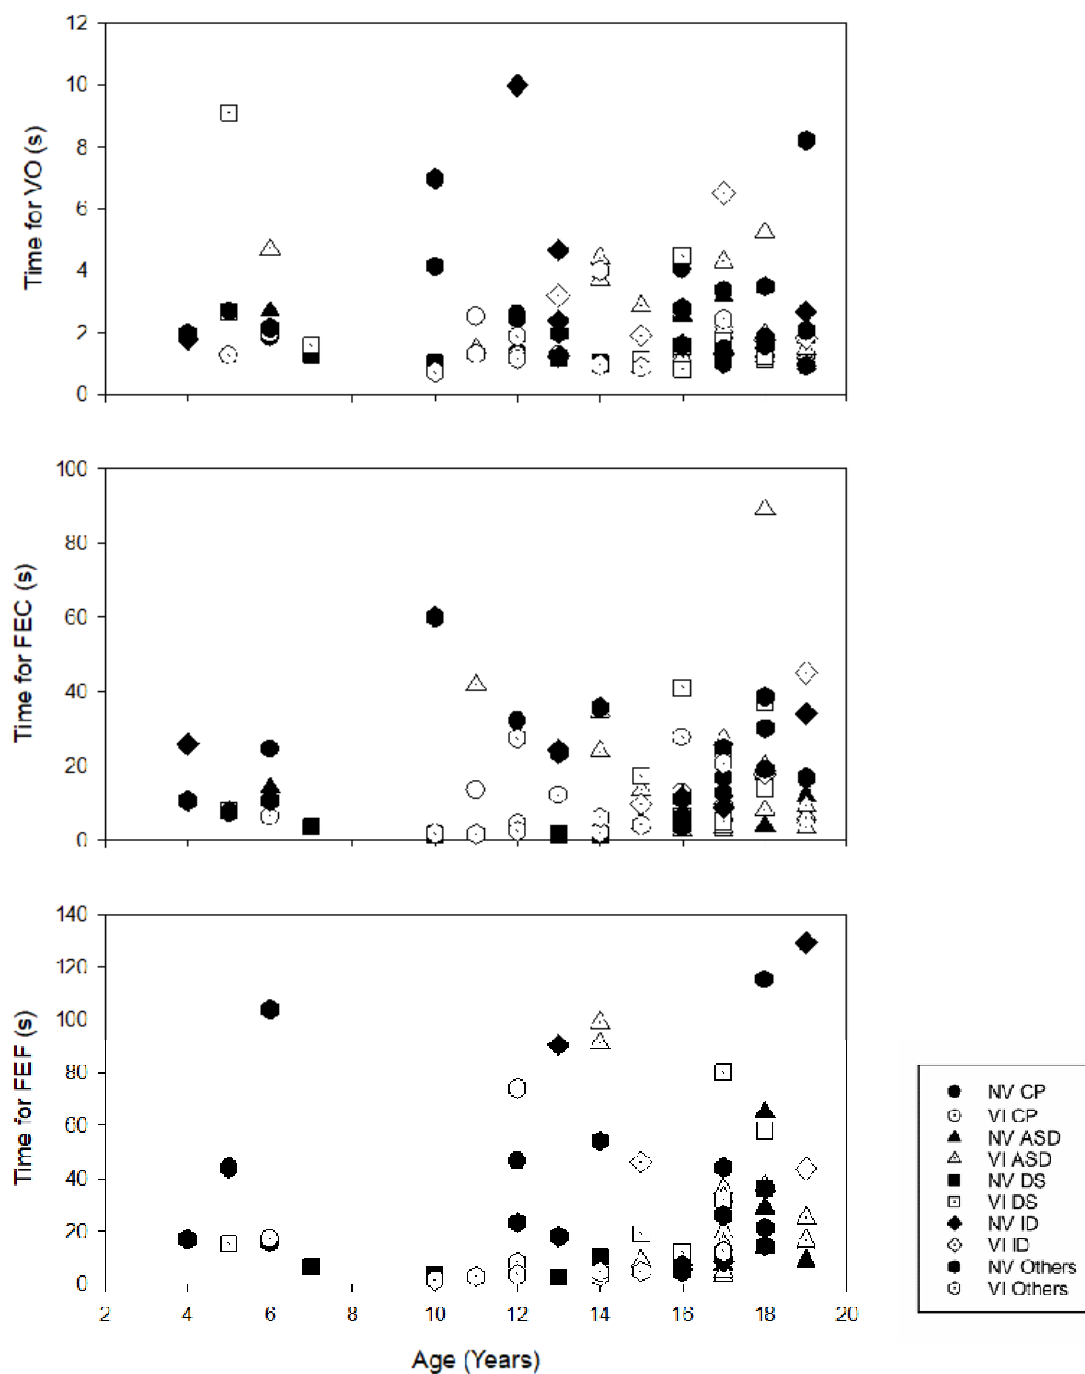

343  
 344 Figure 3. Relationship between visual processing functions and chronological age. Filled  
 345 symbols indicate students with normal vision (NV), while dotted symbols indicate students with  
 346 visual impairment (VI). Circle: Cerebral palsy (CP); Triangle: Autism spectrum disorder (ASD);

347 Square: Down syndrome (DS); Diamond: Isolated intellectual disability (ID); Hexagon: Other  
348 disabilities.

349 The balance functions of SEN students are reduced, regardless of the type of disability. In  
350 children with normal development, the dynamic balance function measured by TUG ranged from  
351 approximately 4 to 7 s.<sup>13, 38</sup> The time needed to complete the TUG task increased from a median  
352 of 7.5 s in gross motor function classification system level I, to 17.8 s in level II, and finally 50.7  
353 s in level III for children with CP,<sup>11</sup> while it was approximately 9 s in adolescents with DS.<sup>13</sup> Our  
354 sample recorded a median of 10.60 s and 13.61 s in SEN students with NV and VI, respectively.  
355 The correlation analysis showed a significant, but weak association between habitual visual  
356 acuity and TUG (Spearman's  $\rho = 0.23$ ,  $p = 0.04$ ). This indicated that visual and non-visual  
357 disabilities compromise SEN students' dynamic balance function in different ways and might  
358 have a composite effect, as dynamic balance function was further reduced in students with both  
359 visual and non-visual disabilities. Several studies have compared static balance function in  
360 sighted and visually impaired participants. In summary, they concluded that visually impaired  
361 individuals had greater postural sway than sighted individuals under open eye condition,  
362 especially in single-leg-standing positions: adults,<sup>19, 39</sup> adolescent,<sup>17</sup> and children.<sup>18, 22</sup> However,  
363 no significant difference was observed between the sighted and visually impaired individuals  
364 under closed eye condition. In the current study, a similar outcome was found in the SEN  
365 students. Those students with normal vision had better static balance performance in open eye  
366 condition than those with visual impairment under tandem stance, while no significant difference  
367 was observed in feet together standing. When visual input was deprived (i.e. eye closed  
368 condition), their static balance function became significantly poorer. However, students with  
369 both visual and non-visual disabilities (i.e. VI group) swayed similarly under eye open and eye

370 closed conditions. It is speculated that students with visual impairment may rely more on their  
371 somatosensory and/or vestibular inputs rather than vision to maintain their postural control,  
372 while NV students rely more on the visual input. Coincidentally, it was observed that similar  
373 balance performance was found in older adults with VI.<sup>40</sup> They swayed significantly more than  
374 NV subjects in static standing under eye open, but displayed no difference with sighted aged-  
375 match subjects when eyes were closed. The reliance on somatosensory input was shown when  
376 subjects with VI stood under a sway-reference support surface with eye open swayed  
377 significantly more than the sighted subjects.<sup>40</sup> Further studies examining the contribution of  
378 multi-sensory inputs to postural control, and functional activities, such as obstacle avoidance and  
379 crossing, are needed. Such knowledge could facilitate the design of balance training protocols for  
380 students with SEN.

381 Taiwan initiated a national-wide registry policy for children with disabilities in the 1980's to  
382 better understand and provide support for those with SEN. The combined prevalence of SEN  
383 increased from 1.0% to 1.5% over three decades,<sup>41</sup> affecting more males, especially in rural  
384 areas.<sup>42</sup> Institutionalised care, e.g. special schools, has been the mainstream for the special care  
385 service,<sup>43</sup> providing educational, occupational, and vocational training for registrants. Although  
386 resources had been pooled for rehabilitation services, the prevalence of the beneficiaries was still  
387 low,<sup>44</sup> in which the service recipients only accounted for 24.5% of an 957-subject SEN sample  
388 within a 7-month period. As well as the students with SEN themselves, the primary family carer  
389 may also experience challenges, causing the carers' health status and quality of life to be  
390 significantly lower.<sup>45</sup> In the current study, despite the students attending special care schools,  
391 awareness of visual impairment of the guardians or teachers was still low, in that only 40.3%  
392 reported their children or students to have visual impairment. In addition, nearly one third of the

393 SEN students (n = 32) were found to have uncorrected / under-corrected refractive error. Their  
394 visual acuity was significantly improved by an average of LogMAR 0.33 by merely updating  
395 their optical aids. This phenomenon indicates the necessity of regular eye examinations for the  
396 SEN population, as suggested in previous studies.<sup>8, 9, 46</sup>

397 There were several limitations in the current study. Firstly, the self-reporting disability status was  
398 less reliable than reviewing a full medical history. However, due to the compliance with patient  
399 privacy, this information could not be retrieved from the guardians or teachers. Secondly, the  
400 severity of non-visual disabilities was not assessed in the current study, which is speculated to  
401 affect the capability of SEN student to perform different tasks. Most of our tests required  
402 students to have a certain degree of cognitive ability to participate. It is not surprising that almost  
403 half of the participating students could not complete the various conditions in balance  
404 measurement, in particular the tandem stance in eye closed condition. Finally, this study lacked a  
405 longitudinal follow-up to observe the effect of improved vision after updated optical corrections  
406 on visual processing functions (both those measured in the current study and others, including  
407 reading speed, visual memory, and spatial relations) and balance functions in SEN students.

408 To conclude, visual impairment in SEN students is common. However, despite the high  
409 prevalence of visual impairment in this population, our findings suggest that some SEN students'  
410 visual function could be improved by prescribing appropriate and updated refractive correction.  
411 Although slightly reduced vision is not a major limiting factor explaining the deficits of visual  
412 processing function in these SEN students, vision remains an important integral for children's  
413 all-round development and parents and teachers could use tools of sufficient size for training and  
414 learning purposes to overcome their visual impairment. Adequate visual input was also found to

415 be critical for SEN students to maintain their dynamic and static balance functions. Hence,  
416 regular checking and preserving of the vision of SEN students is of high importance.

417

#### 418 **Acknowledgment**

419 This study was supported by The Hong Kong Polytechnic University Community Service Fund  
420 (83CT) and Chinese Mainland Affairs Office Fund. We thank the financial support from Lions  
421 Clubs International MD300 Taiwan Eye Care Network Committee, Taiwan. We thank Dr Pei-  
422 Chang Wu and other ophthalmologists from Chang Gung Hospital for providing part of the  
423 ocular health examination during the trip. In addition, we appreciated the assistance provided by  
424 all volunteering students from The Hong Kong Polytechnic University and Asia University,  
425 volunteers from Taiwan Lions Club and teachers from the participating schools. We also thank  
426 Prof. William Tsang and Ms. Eva Chan from The Open University of Hong Kong to provide  
427 professional advice in preparation of this manuscript. We acknowledge Dr. Maureen Boost for  
428 proofreading this manuscript.



429 **Reference**

- 430 1. Salt A, Sargent J. Common visual problems in children with disability. *Arch Dis Child* 2014;  
431 99(12): 1163-1168.
- 432 2. O'Connor AR, Fielder AR, editors. Visual outcomes and perinatal adversity. *Seminars in Fetal*  
433 *and Neonatal Medicine*; 2007: Elsevier.
- 434 3. Fazzi E, Galli J, Micheletti S. Visual impairment: a common sequela of preterm birth.  
435 *NeoReviews* 2012; 13(9): e542-e550.
- 436 4. Ghasia F, Brunstrom J, Gordon M, Tychsén L. Frequency and severity of visual sensory and  
437 motor deficits in children with cerebral palsy: gross motor function classification scale. *Invest Ophthalmol*  
438 *Vis Sci* 2008; 49(2): 572-580.
- 439 5. Good WV, Hou C, Norcia AM. Spatial contrast sensitivity vision loss in children with cortical  
440 visual impairment. *Invest Ophthalmol Vis Sci* 2012; 53(12): 7730-7734.
- 441 6. Sobrado P, Suárez J, García-Sá FA, Usón E. Refractive errors in children with cerebral palsy,  
442 psychomotor retardation, and other non-cerebral palsy neuromotor disabilities. *Dev Med Child Neurol*  
443 1999; 41(6): 396-403.
- 444 7. Thankappan B, Sidhan N, Aparna K. Ocular disorders in children with autism in special schools.  
445 *J Med Sci Clin Res* 2017; 5: 25199-25203.
- 446 8. Woodhouse JM, Davies N, McAvinchey A, Ryan B. Ocular and visual status among children in  
447 special schools in Wales: the burden of unrecognised visual impairment. *Arch Dis Child* 2014; 99(6):  
448 500-504.
- 449 9. McKerr L, McConnell EL, Black SA, et al. Meeting vision needs of children with special  
450 educational needs: Case studies of the impact on behaviour and academic achievement. *Br J Learn*  
451 *Disabil* 2020; 48(1): 45-58.
- 452 10. Bickley C, Linton J, Sullivan E, Mitchell K, Slota G, Barnes D. Comparison of simultaneous  
453 static standing balance data on a pressure mat and force plate in typical children and in children with  
454 cerebral palsy. *Gait Posture* 2019; 67: 91-98.
- 455 11. Carey H, Martin K, Combs-Miller S, Heathcock JC. Reliability and responsiveness of the timed  
456 up and go test in children with cerebral palsy. *Pediatr Phys Ther* 2016; 28(4): 401-408.
- 457 12. Chen H-L, Yeh C-F, Howe T-H. Postural control during standing reach in children with Down  
458 syndrome. *Res Dev Disabil* 2015; 38: 345-351.
- 459 13. Nicolini-Panisson RDA, Donadio MV. Normative values for the Timed 'Up and Go' test in  
460 children and adolescents and validation for individuals with Down syndrome. *Dev Med Child Neurol*  
461 2014; 56(5): 490-497.

- 462 14. Minshew NJ, Sung K, Jones BL, Furman JM. Underdevelopment of the postural control system  
463 in autism. *Neurology* 2004; 63(11): 2056-2061.
- 464 15. de Sousa AMM, de França Barros J, de Sousa Neto BM. Postural control in children with typical  
465 development and children with profound hearing loss. *Int J Gen Med* 2012; 5: 433.
- 466 16. Blomqvist S, Olsson J, Wallin L, Wester A, Rehn B. Adolescents with intellectual disability have  
467 reduced postural balance and muscle performance in trunk and lower limbs compared to peers without  
468 intellectual disability. *Res Dev Disabil* 2013; 34(1): 198-206.
- 469 17. Klavina A, Jekabsone I. Static balance of persons with intellectual disabilities, visual impairment,  
470 and without disabilities. *Eur J Adapt Phys Act* 2014; 7(1): 50-57.
- 471 18. Klavina A, Zusa-Rodke A, Galeja Z. The assessment of static balance in children with hearing,  
472 visual and intellectual disabilities. *Acta Gymnica* 2017; 47(3): 105-111.
- 473 19. Alghadir AH, Alotaibi AZ, Iqbal ZA. Postural stability in people with visual impairment. *Brain*  
474 *Behav* 2019; 9(11): e01436.
- 475 20. Zipori AB, Colpa L, Wong AM, Cushing SL, Gordon KA. Postural stability and visual  
476 impairment: Assessing balance in children with strabismus and amblyopia. *PLoS One* 2018; 13(10):  
477 e0205857.
- 478 21. Legrand A, Quoc EB, Vacher SW, et al. Postural control in children with strabismus: effect of  
479 eye surgery. *Neurosci Lett* 2011; 501(2): 96-101.
- 480 22. Määrsepp I, Arjokesse R, Erelina J, Pääsuke M, Gapeyeva H. Impact of visual impairment on  
481 static and dynamic postural control and habitual physical activity in children aged 10–16 years. *Br J Vis*  
482 *Impair* 2018; 36(3): 227-237.
- 483 23. Zylka J, Lach U, Rutkowska I. Functional balance assessment with pediatric balance scale in girls  
484 with visual impairment. *Pediatr Phys Ther* 2013; 25(4): 460-466.
- 485 24. Rutkowska I, Lieberman LJ, Bednarczuk G, et al. Bilateral coordination of children who are blind.  
486 *Percept Mot Skills* 2016; 122(2): 595-609.
- 487 25. Hyvärinen L. Assessment of visual processing disorders in children with other disabilities. *Neuro-*  
488 *ophthalmol* 2009; 33(3): 158-161.
- 489 26. Pueyo R, Junqué C, Vendrell P, Narberhaus A, Segarra D. Neuropsychologic impairment in  
490 bilateral cerebral palsy. *Pediatr Neurol* 2009; 40(1): 19-26.
- 491 27. Guillon Q, Rogé B, Afzali MH, Baduel S, Kruck J, Hadjikhani N. Intact perception but abnormal  
492 orientation towards face-like objects in young children with ASD. *Sci Rep* 2016; 6: 22119.
- 493 28. Walsh JA, Creighton SE, Rutherford M. Emotion perception or social cognitive complexity: what  
494 drives face processing deficits in autism spectrum disorder? *J Autism Dev Disord* 2016; 46(2): 615-623.

- 495 29. Molloy CS, Di Battista AM, Anderson VA, et al. The contribution of visual processing to  
496 academic achievement in adolescents born extremely preterm or extremely low birth weight. *Child*  
497 *Neuropsychol* 2017; 23(3): 361-379.
- 498 30. Hyvärinen L. Considerations in evaluation and treatment of the child with low vision. *Am J*  
499 *Occup Ther* 1995; 49(9): 891-897.
- 500 31. Hyvärinen L, Walthes R, Jacob N, Lawrence L, Chaplin K. Delayed visual development:  
501 development of vision and visual delays. American Academy of Ophthalmology, 2017.
- 502 32. Podsiadlo D, Richardson S. The timed “Up & Go”: a test of basic functional mobility for frail  
503 elderly persons. *J Am Geriatr Soc* 1991; 39(2): 142-148.
- 504 33. Templeton GF. A two-step approach for transforming continuous variables to normal:  
505 implications and recommendations for IS research. *Commun Assoc Inf Syst* 2011; 28(1).
- 506 34. Rahi JS, Cable N, Group BCVIS. Severe visual impairment and blindness in children in the UK.  
507 *The Lancet* 2003; 362(9393): 1359-1365.
- 508 35. Steinkuller PG, Du L, Gilbert C, Foster A, Collins ML, Coats DK. Childhood blindness. *J*  
509 *AAPOS* 1999; 3(1): 26-32.
- 510 36. Kong L, Fry M, Al-Samarraie M, Gilbert C, Steinkuller PG. An update on progress and the  
511 changing epidemiology of causes of childhood blindness worldwide. *J AAPOS* 2012; 16(6): 501-507.
- 512 37. Ministry of Health and Welfare. Physicians Act. Taiwan: Laws & Regulations Database of The  
513 Republic of China, 2020.
- 514 38. Itzkowitz A, Kaplan S, Doyle M, et al. Timed up and go: Reference data for children who are  
515 school age. *Pediatr Phys Ther* 2016; 28(2): 239-246.
- 516 39. Giagazoglou P, Amiridis IG, Zafeiridis A, Thimara M, Kouveliotti V, Kellis E. Static balance  
517 control and lower limb strength in blind and sighted women. *Eur J Appl Physiol* 2009; 107(5): 571-579.
- 518 40. Chen EW, Fu AS, Chan K, Tsang WW. Balance control in very old adults with and without  
519 visual impairment. *Eur J Appl Physiol* 2012; 112(5): 1631-1636.
- 520 41. Lai DC, Tseng YC, Guo HR. Trends in the prevalence of childhood disability: Analysis of data  
521 from the national disability registry of Taiwan, 2000–2011. *Res Dev Disabil* 2013; 34(11): 3766-3772.
- 522 42. Lai DC, Tseng YC, Hou YM, Guo HR. Gender and geographic differences in the prevalence of  
523 intellectual disability in children: Analysis of data from the national disability registry of Taiwan. *Res Dev*  
524 *Disabil* 2012; 33(6): 2301-2307.
- 525 43. Lin LP, Lin JD. Perspectives on intellectual disability in Taiwan: epidemiology, policy and  
526 services for children and adults. *Curr Opin Psychiatry* 2011; 24(5): 413-418.

- 527 44. Lin JD, Yen CF, Loh CH, Li CW, Wu JL. Rehabilitation service utilization and determinants  
528 among people with an intellectual disability: Preliminary findings in Taiwan. *Disabil Rehabil* 2006;  
529 28(23): 1499-1506.
- 530 45. Chou YC, Chiao C, Fu LY. Health status, social support, and quality of life among family carers  
531 of adults with profound intellectual and multiple disabilities (PIMD) in Taiwan. *J Intellect Dev Disabil*  
532 2011; 36(1): 73-79.
- 533 46. Das M, Spowart K, Crossley S, Dutton GN. Evidence that children with special needs all require  
534 visual assessment. *Arch Dis Child* 2010; 95(11): 888-892.
- 535
